# Supplementary material for: Molecular Characterisation of Colour Formation in the Prawn Fenneropenaeus merguiensis
Source: PubMed Central journal article supplement (PMC3575496; doi:10.1371/journal.pone.0056920), 2013-02-18

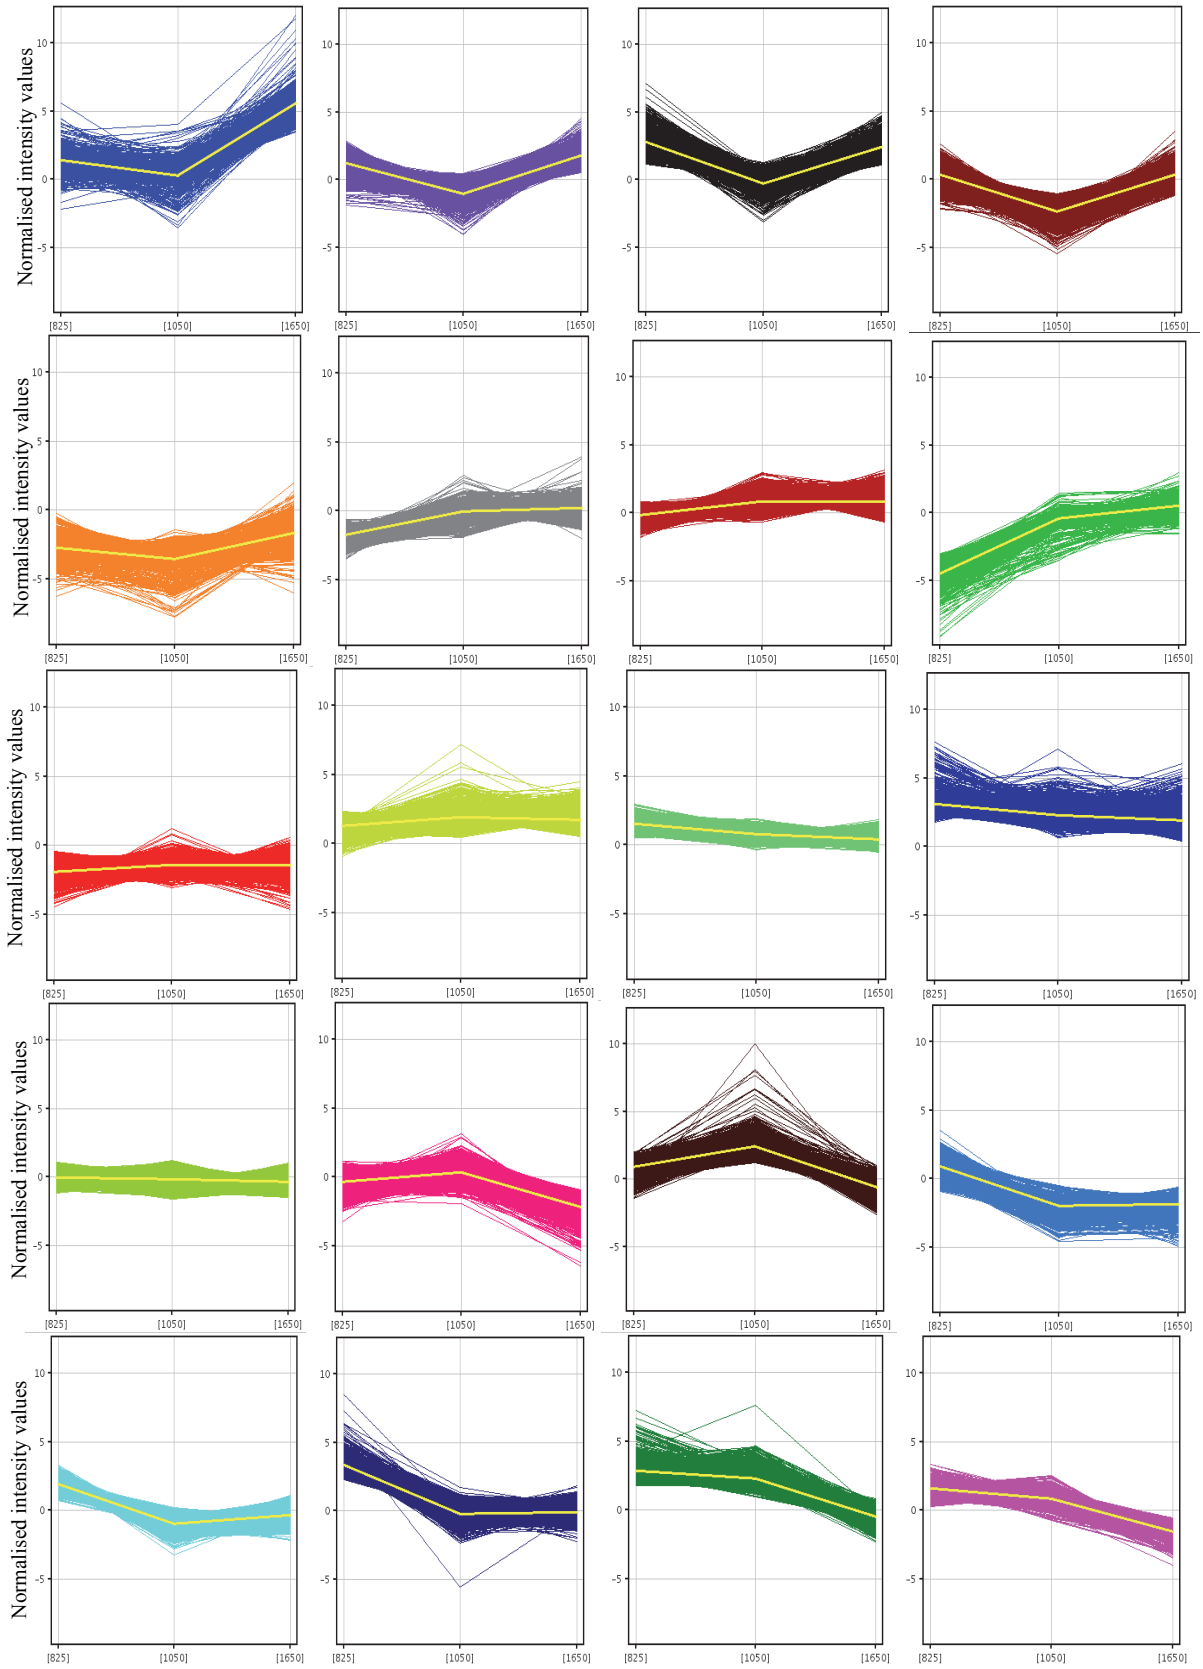

Supplement: pone.0056920.s003.pdf [file pone.0056920.s003.pdf]
