# Supplementary material for: Molecular Characterisation of Colour Formation in the Prawn Fenneropenaeus merguiensis
Source: PubMed Central journal article supplement (PMC3575496; doi:10.1371/journal.pone.0056920), 2013-02-18
Supplement: pone.0056920.s006.pdf [file pone.0056920.s006.pdf]

| Gene ID                              | Number of probes differentially expressed and common only between the below comparisons |                                     |                                       |                                 |
|--------------------------------------|-----------------------------------------------------------------------------------------|-------------------------------------|---------------------------------------|---------------------------------|
|                                      | Dark & Light and Albino & Light only                                                    | Dark & Light and Albino & Dark only | Albino & Dark and Albino & Light only | Common to all three comparisons |
| arginine kinase/allergen Pen m       | 0                                                                                       | 0                                   | 14                                    | 0                               |
| crustacyanin A                       | 0                                                                                       | 0                                   | 4                                     | 0                               |
| crustin                              | 0                                                                                       | 2                                   | 0                                     | 0                               |
| cytochrome c oxidase subunit I       | 2                                                                                       | 0                                   | 0                                     | 0                               |
| male reproductive related protein    | 5                                                                                       | 0                                   | 0                                     | 0                               |
| mitochondrion                        | 2                                                                                       | 2                                   | 0                                     | 0                               |
| myosin heavy chain                   | 2                                                                                       | 0                                   | 0                                     | 0                               |
| myosin light chain                   | 2                                                                                       | 0                                   | 0                                     | 0                               |
| myosin light chain or calmodulin     | 0                                                                                       | 0                                   | 2                                     | 0                               |
| QM protein                           | 2                                                                                       | 0                                   | 2                                     | 0                               |
| ribosomal RNA                        | 2                                                                                       | 0                                   | 0                                     | 0                               |
| sarcoplasmic calcium-binding protein | 2                                                                                       | 0                                   | 17                                    | 3                               |
| some type of actin                   | 0                                                                                       | 4                                   | 44                                    | 12                              |
| tropomyosin                          | 0                                                                                       | 0                                   | 7                                     | 0                               |
| troponin I                           | 18                                                                                      | 0                                   | 3                                     | 0                               |
| uannotated                           | 28                                                                                      | 20                                  | 45                                    | 9                               |
| <b>Total</b>                         | <b>65</b>                                                                               | <b>28</b>                           | <b>138</b>                            | <b>24</b>                       |
