# Supplementary material for: Molecular Characterisation of Colour Formation in the Prawn Fenneropenaeus merguiensis
Source: PubMed Central journal article supplement (PMC3575496; doi:10.1371/journal.pone.0056920), 2013-02-18
Supplement: pone.0056920.s007.pdf [file pone.0056920.s007.pdf]

| <b>ID #</b> | <b>Colour</b> | <b>Crustacyanin subunit<br/>A copy number</b> | <b>Crustacyanin subunit<br/>C copy number</b> |
|-------------|---------------|-----------------------------------------------|-----------------------------------------------|
| 173         | Albino        | 1267.15                                       | 861.02                                        |
| 174         | Albino        | 134.58                                        | 137.64                                        |
| 175         | Albino        | 142.43                                        | 68.81                                         |
| 176         | Albino        | 19.33                                         | 68.81                                         |
| 177         | Albino        | 3345.61                                       | 530.31                                        |
| 180         | Albino        | 19.33                                         | 68.81                                         |
| 181         | Albino        | 3620.55                                       | 3724.27                                       |
| 182         | Albino        | 19.33                                         | 68.81                                         |
| 183         | Albino        | 19.33                                         | 68.81                                         |
| 1           | Light         | 131984.84                                     | 230218.37                                     |
| 3           | Light         | 18187.99                                      | 6480.19                                       |
| 6           | Light         | 7341.53                                       | 5733.94                                       |
| 7           | Light         | 92865.69                                      | 47290.65                                      |
| 14          | Light         | 851892.31                                     | 1389450.38                                    |
| 15          | Light         | 402159.52                                     | 386660.32                                     |
| 19          | Light         | 94230.62                                      | 50019.29                                      |
| 20          | Light         | 82934.33                                      | 54547.21                                      |
| 22          | Light         | 57544.00                                      | 32276.43                                      |
| 24          | Light         | 2702.33                                       | 667.43                                        |
| 25          | Light         | 12148.26                                      | 5529.37                                       |
| 91          | Light         | 6278.89                                       | 4704.82                                       |
| 11          | Dark          | 9660.08                                       | 6572.52                                       |
| 30          | Dark          | 108590.36                                     | 53990.80                                      |
| 86          | Dark          | 205113.76                                     | 174745.35                                     |
| 87          | Dark          | 66485.62                                      | 30461.60                                      |
| 88          | Dark          | 62.34                                         | 68.81                                         |
| 90          | Dark          | 2604.43                                       | 1048.08                                       |
| 93          | Dark          | 9222.36                                       | 5464.88                                       |
| 95          | Dark          | 49365.15                                      | 31459.62                                      |
| 97          | Dark          | 6300.11                                       | 5117.33                                       |
| 101         | Dark          | 5205.81                                       | 2627.47                                       |
| 104         | Dark          | 68388.86                                      | 87326.61                                      |
| 109         | Dark          | 5719.56                                       | 1815.07                                       |
